# Supplementary material for: Glycolysis Inhibition of Autophagy Drives Malignancy in Ovarian Cancer: Exacerbation by IL-6 and Attenuation by Resveratrol
Source: MDPI journal article supplement (doi:10.3390/ijms24021723), 2023-01-15
Supplement: s1 [file s1]

**S1**

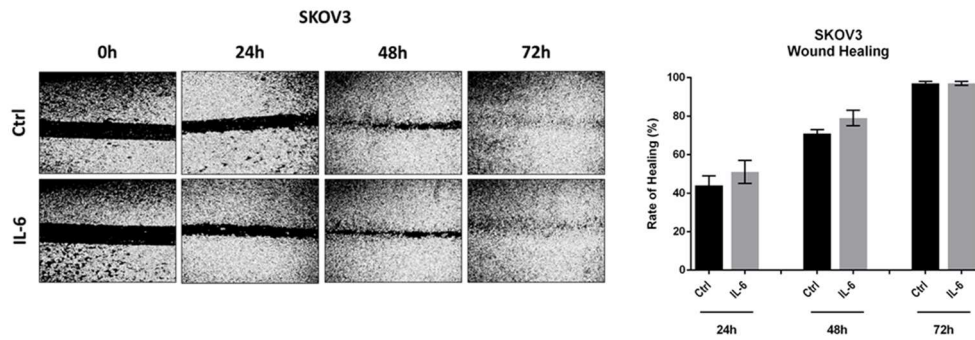

Figure S1. IL-6 fails to stimulate SKOV3 cell migration. SKOV3 cells were exposed or not to 50 ng/ml IL-6. Medium was renewed every 24 hours. The wound closure was monitored up to 72 hours by using a phase-contrast microscope. The rate of healing (%) for each experimental time-point, indicated as the distance between the margins of the wound, was calculated by using ImageJ software. Data represent the average  $\pm$  SD calculated for three different fields per each condition.

**S2**

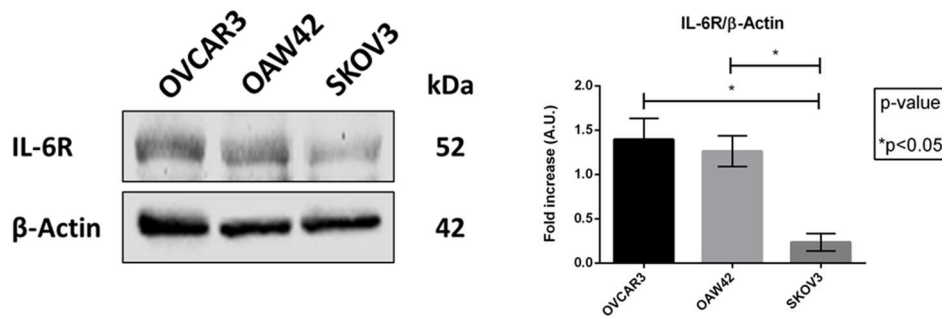

Figure S2. Expression of IL-6R in the three ovarian cancer cell models. OVCAR3, OAW42, and SKOV3 cell homogenates were analyzed by western blotting for the expression of IL-6R. The filter was probed with  $\beta$ -Actin as loading control. The western blotting is representative of three replicates and densitometric data are reported in the graph.
